# Supplementary material for: Salinity tolerance, Na+ exclusion and allele mining of HKT1;5 in Oryza sativa and O. glaberrima: many sources, many genes, one mechanism?
Source: PubMed Central journal article supplement (PMC3599985; doi:10.1186/1471-2229-13-32), 2013-02-27

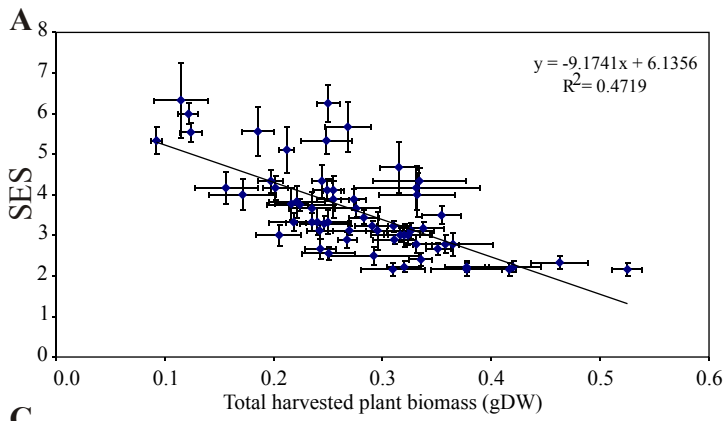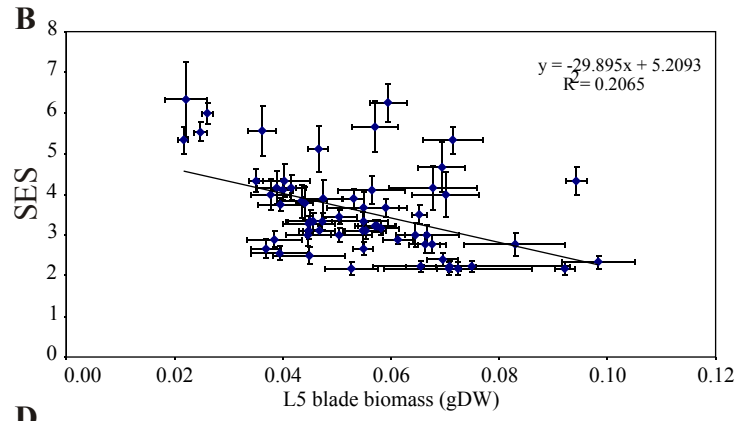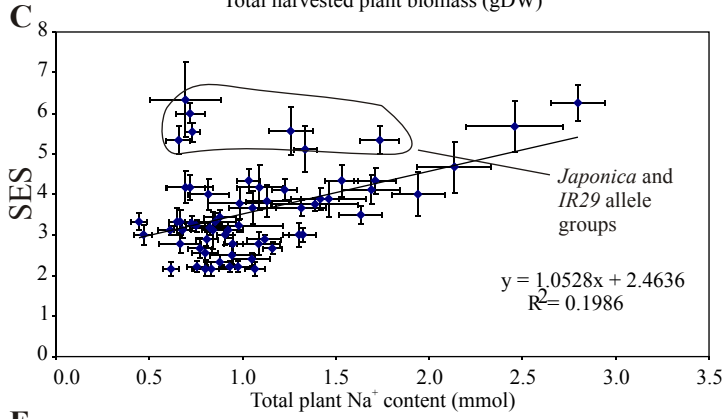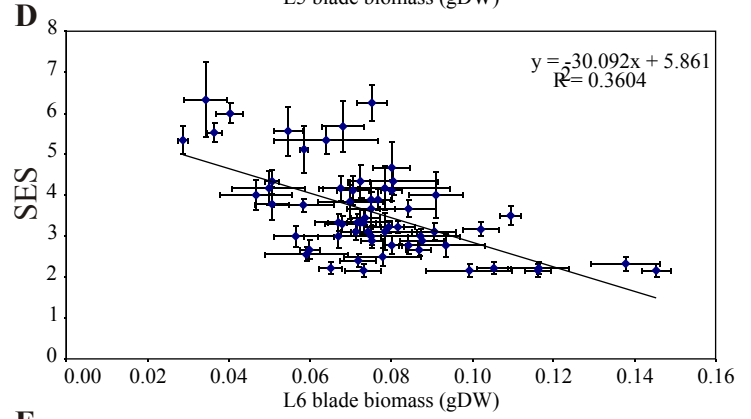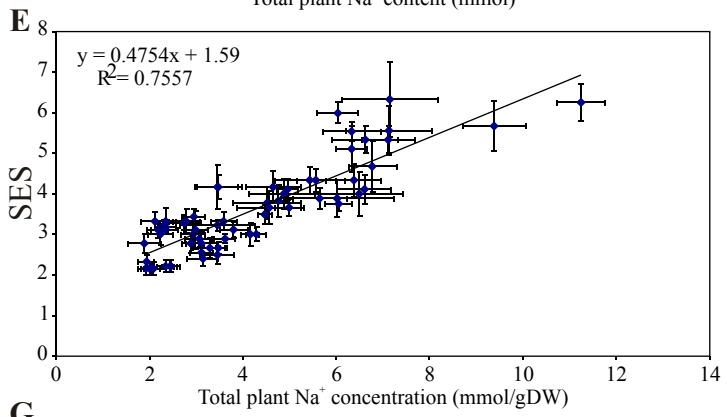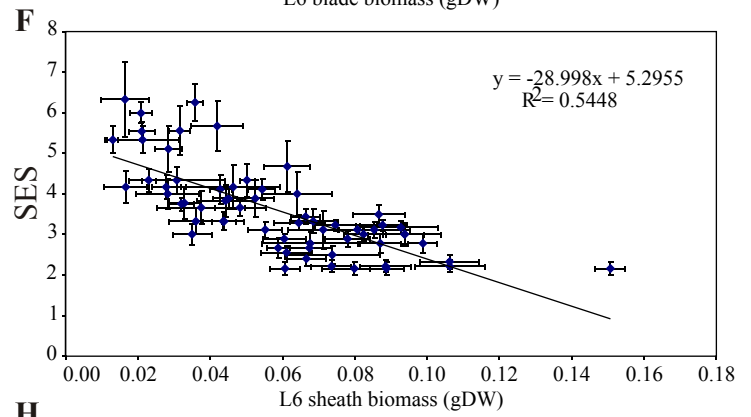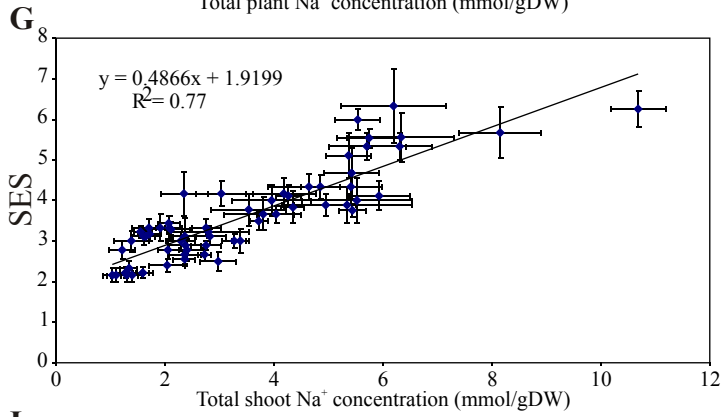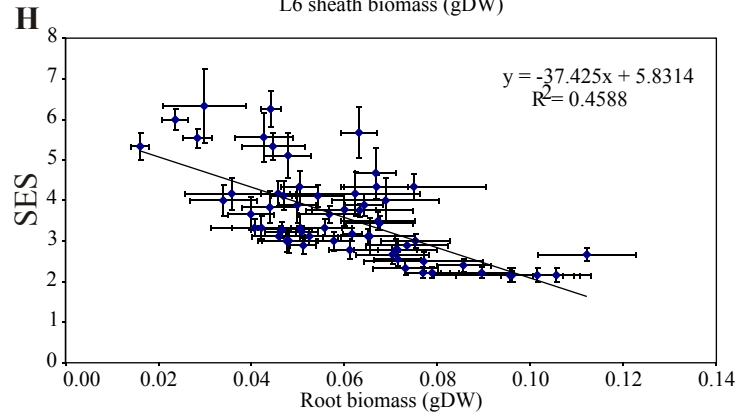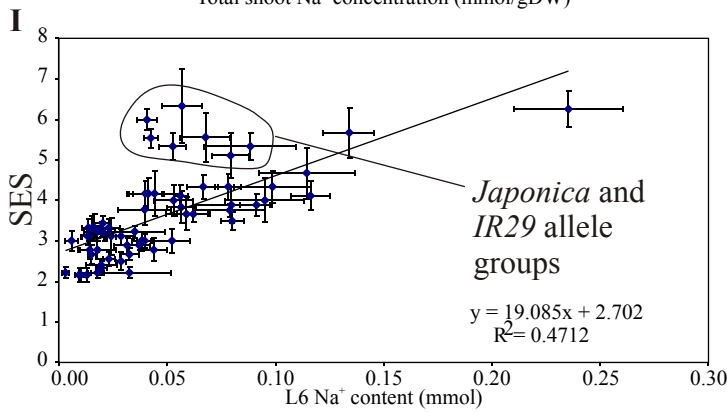

Supplement: 1471-2229-13-32-S4.pdf [file 1471-2229-13-32-S4.pdf]
